# Supplementary material
Source: MDPI journal article supplement (https://www.mdpi.com/2304-6740/6/1/33)

# checkCIF/PLATON report

You have not supplied any structure factors. As a result the full set of tests cannot be run.

THIS REPORT IS FOR GUIDANCE ONLY. IF USED AS PART OF A REVIEW PROCEDURE FOR PUBLICATION, IT SHOULD NOT REPLACE THE EXPERTISE OF AN EXPERIENCED CRYSTALLOGRAPHIC REFEREE.

No syntax errors found.      CIF dictionary      Interpreting this report

## Datablock: ad56

---

Bond precision:    C-C = 0.0038 A

Wavelength=0.71073

Cell:                a=10.6278(15)                b=17.806(2)                c=9.7465(13)  
                      alpha=96.093(16)    beta=90.759(17)    gamma=102.995(16)  
Temperature:    160 K

|                | Calculated                           | Reported                  |
|----------------|--------------------------------------|---------------------------|
| Volume         | 1785.7(4)                            | 1785.7(4)                 |
| Space group    | P -1                                 | P -1                      |
| Hall group     | -P 1                                 | ?                         |
| Moiety formula | 4(C15 H20 N3 Ni O2), 4(Cl O4), C H O | ?                         |
| Sum formula    | C61 H81 Cl4 N12 Ni4 O25              | C15.25 H21 Cl N3 Ni O6.25 |
| Mr             | 1758.94                              | 440.51                    |
| Dx,g cm-3      | 1.636                                | 1.639                     |
| Z              | 1                                    | 4                         |
| Mu (mm-1)      | 1.276                                | 1.276                     |
| F000           | 911.0                                | 914.0                     |
| F000'          | 913.33                               |                           |
| h,k,lmax       | 12,20,11                             | 12,20,11                  |
| Nref           | 5756                                 | 5334                      |
| Tmin,Tmax      | 0.638,0.880                          | 0.617,0.878               |
| Tmin'          | 0.594                                |                           |

Correction method= # Reported T Limits: Tmin=0.617 Tmax=0.878  
AbsCorr = NUMERICAL

Data completeness= 0.927

Theta(max)= 24.190

R(reflections)= 0.0287( 4183)

wR2(reflections)= 0.0611( 5334)

S = 0.933

Npar= 456

---

The following ALERTS were generated. Each ALERT has the format

**test-name\_ALERT\_alert-type\_alert-level.**

Click on the hyperlinks for more details of the test.

---

### Alert level A

|                   |                                          |             |       |             |
|-------------------|------------------------------------------|-------------|-------|-------------|
| PLAT029_ALERT_3_A | _diffrn_measured_fraction_theta_full     | value Low   | 0.927 | Why?        |
| PLAT183_ALERT_1_A | Missing _cell_measurement_reflms_used    | Value ....  |       | Please Do ! |
| PLAT184_ALERT_1_A | Missing _cell_measurement_theta_min      | Value ..... |       | Please Do ! |
| PLAT185_ALERT_1_A | Missing _cell_measurement_theta_max      | Value ..... |       | Please Do ! |
| PLAT201_ALERT_2_A | Isotropic non-H Atoms in Main Residue(s) | .....       | 14    | Report      |

---

### Alert level B

|                   |                                |       |   |           |
|-------------------|--------------------------------|-------|---|-----------|
| PLAT232_ALERT_2_B | Hirshfeld Test Diff (M-X) Ni2B | --N3B | . | 10.3 s.u. |
|-------------------|--------------------------------|-------|---|-----------|

---

### Alert level C

|                   |                                                                      |                              |        |              |
|-------------------|----------------------------------------------------------------------|------------------------------|--------|--------------|
| THETM01_ALERT_3_C | The value of sine(theta_max)/wavelength is less than 0.590           |                              |        |              |
|                   | Calculated sin(theta_max)/wavelength                                 | =                            | 0.5765 |              |
| WEIGH01_ALERT_1_C | Extra text has been found in the                                     |                              |        |              |
|                   | _refine_ls_weighting_scheme                                          | field. This should be in the |        |              |
|                   | _refine_ls_weighting_details                                         | field.                       |        |              |
|                   | Weighting scheme given as calc w=1/[\s^2^(Fo^2^)+(0.0416P)^2^+0.0000 |                              |        |              |
|                   | Weighting scheme identified as calc                                  |                              |        |              |
| PLAT041_ALERT_1_C | Calc. and Reported SumFormula                                        | Strings Differ               |        | Please Check |
| PLAT043_ALERT_1_C | Calculated and Reported Mol. Weight                                  | Differ by ..                 | 3.10   | Check        |
| PLAT155_ALERT_4_C | The Triclinic Unitcell is NOT Reduced                                | .....                        |        | Please Do !  |
| PLAT232_ALERT_2_C | Hirshfeld Test Diff (M-X) Ni1A                                       | --O1A                        | .      | 5.3 s.u.     |
| PLAT232_ALERT_2_C | Hirshfeld Test Diff (M-X) Ni1A                                       | --N3A                        | .      | 5.4 s.u.     |
| PLAT243_ALERT_4_C | High 'Solvent' Ueq as Compared to Neighbors of                       |                              | 07     | Check        |

---

### Alert level G

|                   |                                                                     |                                            |           |              |
|-------------------|---------------------------------------------------------------------|--------------------------------------------|-----------|--------------|
| FORMU01_ALERT_2_G | There is a discrepancy between the atom counts in the               |                                            |           |              |
|                   | _chemical_formula_sum                                               | and the formula from the _atom_site* data. |           |              |
|                   | Atom count from _chemical_formula_sum: C15.25 H21 Cl1 N3 Ni1 O6.25  |                                            |           |              |
|                   | Atom count from the _atom_site data: C15.25 H20.25 Cl1 N3 Ni1 O6.25 |                                            |           |              |
| CELLZ01_ALERT_1_G | Difference between formula and atom_site contents detected.         |                                            |           |              |
| CELLZ01_ALERT_1_G | WARNING: H atoms missing from atom site list. Is this intentional?  |                                            |           |              |
|                   | From the CIF: _cell_formula_units_Z                                 | 4                                          |           |              |
|                   | From the CIF: _chemical_formula_sum                                 | C15.25 H21 Cl1 N3 Ni1 O6.25                |           |              |
|                   | TEST: Compare cell contents of formula and atom_site data           |                                            |           |              |
|                   | atom                                                                | Z*formula                                  | cif sites | diff         |
|                   | C                                                                   | 61.00                                      | 61.00     | 0.00         |
|                   | H                                                                   | 84.00                                      | 81.00     | 3.00         |
|                   | Cl                                                                  | 4.00                                       | 4.00      | 0.00         |
|                   | N                                                                   | 12.00                                      | 12.00     | 0.00         |
|                   | Ni                                                                  | 4.00                                       | 4.00      | 0.00         |
|                   | O                                                                   | 25.00                                      | 25.00     | 0.00         |
| PLAT003_ALERT_2_G | Number of Uiso or Uij Restrained non-H Atoms                        | ...                                        | 8         | Report       |
| PLAT005_ALERT_5_G | No Embedded Refinement Details Found                                | in the CIF                                 |           | Please Do !  |
| PLAT007_ALERT_5_G | Number of Unrefined Donor-H Atoms                                   | .....                                      | 3         | Report       |
| PLAT045_ALERT_1_G | Calculated and Reported Z                                           | Differ by a Factor ...                     | 0.25      | Check        |
| PLAT068_ALERT_1_G | Reported F000 Differs from Calcd (or Missing)...                    |                                            |           | Please Check |
| PLAT231_ALERT_4_G | Hirshfeld Test (Solvent) Cl2                                        | --O9                                       | .         | 15.0 s.u.    |
| PLAT244_ALERT_4_G | Low 'Solvent' Ueq as Compared to Neighbors of                       |                                            | Cl1       | Check        |
| PLAT300_ALERT_4_G | Atom Site Occupancy of Cl2                                          | Constrained at                             | 0.6       | Check        |
| PLAT300_ALERT_4_G | Atom Site Occupancy of Cl2'                                         | Constrained at                             | 0.4       | Check        |
| PLAT300_ALERT_4_G | Atom Site Occupancy of O8                                           | Constrained at                             | 0.6       | Check        |

|                   |                                                  |                |       |              |
|-------------------|--------------------------------------------------|----------------|-------|--------------|
| PLAT300_ALERT_4_G | Atom Site Occupancy of O9                        | Constrained at | 0.6   | Check        |
| PLAT300_ALERT_4_G | Atom Site Occupancy of O10                       | Constrained at | 0.6   | Check        |
| PLAT300_ALERT_4_G | Atom Site Occupancy of O8'                       | Constrained at | 0.4   | Check        |
| PLAT300_ALERT_4_G | Atom Site Occupancy of O9'                       | Constrained at | 0.4   | Check        |
| PLAT300_ALERT_4_G | Atom Site Occupancy of O10'                      | Constrained at | 0.4   | Check        |
| PLAT300_ALERT_4_G | Atom Site Occupancy of O11                       | Constrained at | 0.5   | Check        |
| PLAT300_ALERT_4_G | Atom Site Occupancy of Cl6                       | Constrained at | 0.5   | Check        |
| PLAT300_ALERT_4_G | Atom Site Occupancy of H11                       | Constrained at | 0.5   | Check        |
| PLAT302_ALERT_4_G | Anion/Solvent/Minor-Residue Disorder (Resd 3)    |                | 80%   | Note         |
| PLAT302_ALERT_4_G | Anion/Solvent/Minor-Residue Disorder (Resd 5)    |                | 100%  | Note         |
| PLAT304_ALERT_4_G | Non-Integer Number of Atoms in .....             |                | 5.    | Check        |
| PLAT380_ALERT_4_G | Incorrectly? Oriented X(sp2)-Methyl Moiety ..... |                | C15A  | Check        |
| PLAT432_ALERT_2_G | Short Inter X...Y Contact Cl2' ..O11             |                | 2.96  | Ang.         |
| PLAT432_ALERT_2_G | Short Inter X...Y Contact O10 ..Cl2A             |                | 3.01  | Ang.         |
| PLAT432_ALERT_2_G | Short Inter X...Y Contact O11 ..Cl6              |                | 2.61  | Ang.         |
| PLAT432_ALERT_2_G | Short Inter X...Y Contact O8' ..Cl6              |                | 2.68  | Ang.         |
| PLAT432_ALERT_2_G | Short Inter X...Y Contact Cl6 ..Cl6              |                | 1.34  | Ang.         |
| PLAT720_ALERT_4_G | Number of Unusual/Non-Standard Labels .....      |                | 6     | Note         |
| PLAT721_ALERT_1_G | Bond Calc 0.91000, Rep 0.84000 Dev...            |                | 0.07  | Ang.         |
|                   | O11 -H11 1.555 1.555 .....                       | #              | 102   | Check        |
| PLAT722_ALERT_1_G | Angle Calc 113.00, Rep 109.50 Dev...             |                | 3.50  | Degree       |
|                   | Cl6 -O11 -H11 1.555 1.555 1.555                  | #              | 180   | Check        |
| PLAT725_ALERT_2_G | D-H Calc 0.91000, Rep 0.84000 Dev...             |                | 0.07  | Ang.         |
|                   | O11 -H11 1.555 1.555 .....                       | #              | 103   | Check        |
| PLAT726_ALERT_2_G | H...A Calc 2.88000, Rep 2.02000 Dev...           |                | 0.86  | Ang.         |
|                   | H11 -O2B 1.555 1.555 .....                       | #              | 103   | Check        |
| PLAT728_ALERT_1_G | D-H...A Calc 65.00, Rep 129.00 Dev...            |                | 64.00 | Degree       |
|                   | O11 -H11 -O2B 1.555 1.555 1.555                  | #              | 181   | Check        |
| PLAT779_ALERT_4_G | Suspect or Irrelevant (Bond) Angle in CIF ....   | #              | 179   | Check        |
|                   | Cl2' -O7 -Cl2 1.555 1.555 1.555                  |                | 29.90 | Deg.         |
| PLAT790_ALERT_4_G | Centre of Gravity not Within Unit Cell: Resd. #  |                | 3     | Note         |
|                   | Cl O4                                            |                |       |              |
| PLAT808_ALERT_5_G | No Parseable SHELXL Style Weighting Scheme Found |                |       | Please Check |
| PLAT860_ALERT_3_G | Number of Least-Squares Restraints .....         |                | 12    | Note         |
| PLAT899_ALERT_4_G | SHELXL97 is Deprecated and Succeeded by SHELXL   |                | 2016  | Note         |

- 
- 5 **ALERT level A** = Most likely a serious problem - resolve or explain  
 1 **ALERT level B** = A potentially serious problem, consider carefully  
 8 **ALERT level C** = Check. Ensure it is not caused by an omission or oversight  
 41 **ALERT level G** = General information/check it is not something unexpected
- 13 **ALERT type 1** CIF construction/syntax error, inconsistent or missing data  
 13 **ALERT type 2** Indicator that the structure model may be wrong or deficient  
 3 **ALERT type 3** Indicator that the structure quality may be low  
 23 **ALERT type 4** Improvement, methodology, query or suggestion  
 3 **ALERT type 5** Informative message, check
-

It is advisable to attempt to resolve as many as possible of the alerts in all categories. Often the minor alerts point to easily fixed oversights, errors and omissions in your CIF or refinement strategy, so attention to these fine details can be worthwhile. In order to resolve some of the more serious problems it may be necessary to carry out additional measurements or structure refinements. However, the purpose of your study may justify the reported deviations and the more serious of these should normally be commented upon in the discussion or experimental section of a paper or in the "special\_details" fields of the CIF. checkCIF was carefully designed to identify outliers and unusual parameters, but every test has its limitations and alerts that are not important in a particular case may appear. Conversely, the absence of alerts does not guarantee there are no aspects of the results needing attention. It is up to the individual to critically assess their own results and, if necessary, seek expert advice.

### Publication of your CIF in IUCr journals

A basic structural check has been run on your CIF. These basic checks will be run on all CIFs submitted for publication in IUCr journals (*Acta Crystallographica*, *Journal of Applied Crystallography*, *Journal of Synchrotron Radiation*); however, if you intend to submit to *Acta Crystallographica Section C* or *E* or *IUCrData*, you should make sure that full publication checks are run on the final version of your CIF prior to submission.

### Publication of your CIF in other journals

Please refer to the *Notes for Authors* of the relevant journal for any special instructions relating to CIF submission.

### Validation response form

Please find below a validation response form (VRF) that can be filled in and pasted into your CIF.

```
# start Validation Reply Form
_vrf_THETM01_ad56
;
PROBLEM: The value of sine(theta_max)/wavelength is less than 0.590
RESPONSE: ...
;
_vrf_WEIGH01_ad56
;
PROBLEM: Extra text has been found in the
RESPONSE: ...
;
_vrf_PLAT029_ad56
;
PROBLEM: _diffrn_measured_fraction_theta_full value Low .      0.927 Why?
RESPONSE: ...
;
_vrf_PLAT183_ad56
;
PROBLEM: Missing _cell_measurement_reflns_used Value ....    Please Do !
RESPONSE: ...
;
_vrf_PLAT184_ad56
;
PROBLEM: Missing _cell_measurement_theta_min Value .....    Please Do !
RESPONSE: ...
;
_vrf_PLAT185_ad56
```

```

;
PROBLEM: Missing _cell_measurement_theta_max Value ..... Please Do !
RESPONSE: ...
;
_vrf_PLAT201_ad56
;
PROBLEM: Isotropic non-H Atoms in Main Residue(s) ..... 14 Report
RESPONSE: ...
;
_vrf_PLAT041_ad56
;
PROBLEM: Calc. and Reported SumFormula Strings Differ Please Check
RESPONSE: ...
;
_vrf_PLAT043_ad56
;
PROBLEM: Calculated and Reported Mol. Weight Differ by .. 3.10 Check
RESPONSE: ...
;
_vrf_PLAT155_ad56
;
PROBLEM: The Triclinic Unitcell is NOT Reduced ..... Please Do !
RESPONSE: ...
;
_vrf_PLAT232_ad56
;
PROBLEM: Hirshfeld Test Diff (M-X) NilA --OlA . 5.3 s.u.
RESPONSE: ...
;
_vrf_PLAT243_ad56
;
PROBLEM: High 'Solvent' Ueq as Compared to Neighbors of 07 Check
RESPONSE: ...
;
# end Validation Reply Form

```

---

**PLATON version of 13/08/2017; check.def file version of 12/12/2017**

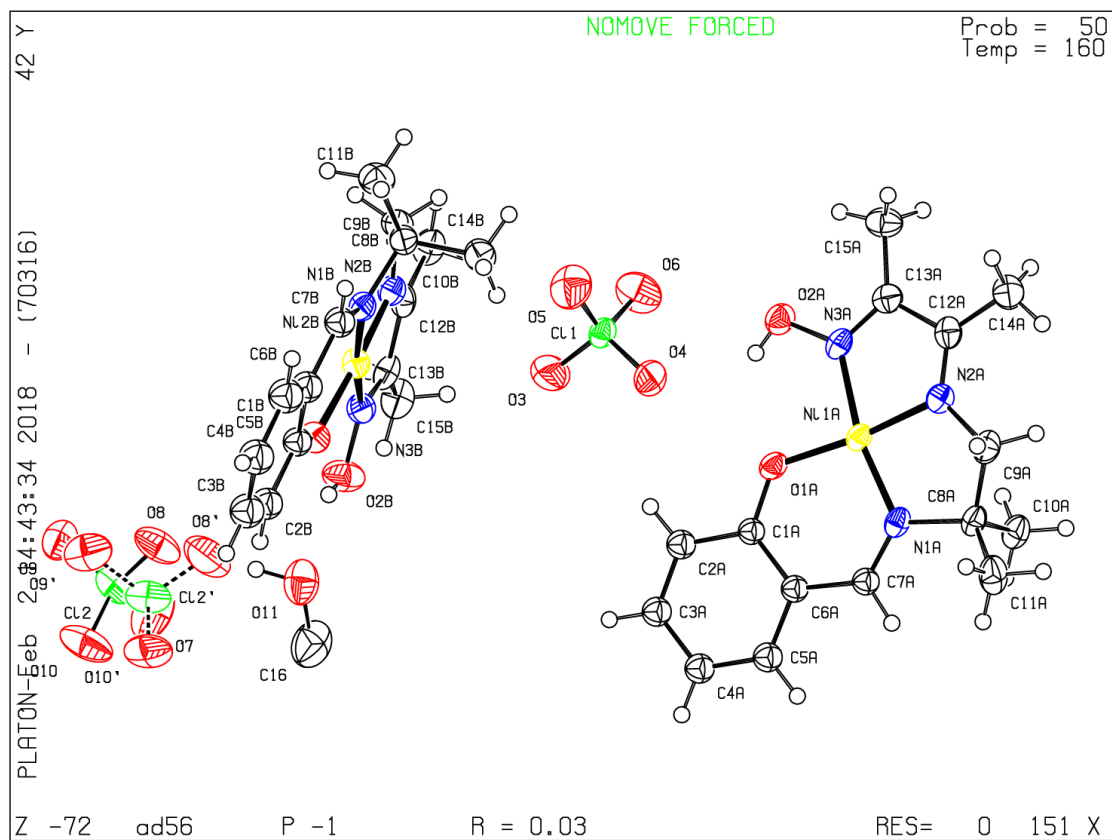

Supplement: s1 [file s1]
