# Supplementary material
Source: MDPI journal article supplement (https://www.mdpi.com/2304-6740/6/1/33)

# checkCIF/PLATON report

You have not supplied any structure factors. As a result the full set of tests cannot be run.

THIS REPORT IS FOR GUIDANCE ONLY. IF USED AS PART OF A REVIEW PROCEDURE FOR PUBLICATION, IT SHOULD NOT REPLACE THE EXPERTISE OF AN EXPERIENCED CRYSTALLOGRAPHIC REFEREE.

No syntax errors found.      CIF dictionary      Interpreting this report

## Datablock: ad26

---

Bond precision:    C-C = 0.0045 A

Wavelength=0.71073

Cell:                a=10.0995(8)                b=10.1606(14)                c=9.0768(10)  
                      alpha=114.210(11)        beta=91.365(8)        gamma=94.020(9)  
Temperature:        293 K

|                | Calculated                   | Reported          |
|----------------|------------------------------|-------------------|
| Volume         | 846.01(18)                   | 846.01(16)        |
| Space group    | P -1                         | P -1              |
| Hall group     | -P 1                         | ?                 |
| Moiety formula | C28 H40 Cu2 N8 O2, 2(C H4 O) | ?                 |
| Sum formula    | C30 H48 Cu2 N8 O4            | C30 H48 Cu2 N8 O4 |
| Mr             | 711.86                       | 711.84            |
| Dx,g cm-3      | 1.397                        | 1.397             |
| Z              | 1                            | 1                 |
| Mu (mm-1)      | 1.303                        | 1.303             |
| F000           | 374.0                        | 374.0             |
| F000'          | 374.74                       |                   |
| h,k,lmax       | 12,12,11                     | 12,12,11          |
| Nref           | 3682                         | 3682              |
| Tmin,Tmax      | 0.562,0.771                  | 0.894,0.999       |
| Tmin'          | 0.551                        |                   |

Correction method= # Reported T Limits: Tmin=0.894 Tmax=0.999  
AbsCorr = PSI-SCAN

Data completeness= 1.000

Theta(max)= 26.970

R(reflections)= 0.0248( 2905)

wR2(reflections)= 0.0655( 3682)

S = 1.115

Npar= 201

---

The following ALERTS were generated. Each ALERT has the format

**test-name\_ALERT\_alert-type\_alert-level.**

Click on the hyperlinks for more details of the test.

---

### Alert level B

|                   |                              |        |      |   |           |
|-------------------|------------------------------|--------|------|---|-----------|
| PLAT230_ALERT_2_B | Hirshfeld Test Diff for      | C6     | --C7 | . | 13.5 s.u. |
| PLAT230_ALERT_2_B | Hirshfeld Test Diff for      | C6     | --C9 | . | 26.7 s.u. |
| PLAT232_ALERT_2_B | Hirshfeld Test Diff (M-X) Cu | --O1_a | .    |   | 22.0 s.u. |

---

### Alert level C

WEIGH01\_ALERT\_1\_C Extra text has been found in the  
\_refine\_ls\_weighting\_scheme field. This should be in the  
\_refine\_ls\_weighting\_details field.  
Weighting scheme given as calc w=1/[\s^2^(Fo^2^)+(0.0235P)^2^+0.3357  
Weighting scheme identified as calc

|                   |                                                  |             |
|-------------------|--------------------------------------------------|-------------|
| PLAT155_ALERT_4_C | The Triclinic Unitcell is NOT Reduced .....      | Please Do ! |
| PLAT230_ALERT_2_C | Hirshfeld Test Diff for O1 --N1 .                | 5.1 s.u.    |
| PLAT230_ALERT_2_C | Hirshfeld Test Diff for C5 --C6 .                | 7.0 s.u.    |
| PLAT241_ALERT_2_C | High 'MainMol' Ueq as Compared to Neighbors of   | C5 Check    |
| PLAT242_ALERT_2_C | Low 'MainMol' Ueq as Compared to Neighbors of    | C6 Check    |
| PLAT250_ALERT_2_C | Large U3/U1 Ratio for Average U(i,j) Tensor .... | 2.7 Note    |
| PLAT412_ALERT_2_C | Short Intra XH3 .. XHn H4A ..H5B ..              | 1.88 Ang.   |

---

### Alert level G

|                   |                                                  |              |
|-------------------|--------------------------------------------------|--------------|
| PLAT005_ALERT_5_G | No Embedded Refinement Details Found in the CIF  | Please Do !  |
| PLAT007_ALERT_5_G | Number of Unrefined Donor-H Atoms .....          | 1 Report     |
| PLAT152_ALERT_1_G | The Supplied and Calc. Volume s.u. Differ by ... | 2 Units      |
| PLAT199_ALERT_1_G | Reported _cell_measurement_temperature .... (K)  | 293 Check    |
| PLAT200_ALERT_1_G | Reported _diffrn_ambient_temperature .... (K)    | 293 Check    |
| PLAT232_ALERT_2_G | Hirshfeld Test Diff (M-X) Cu --N3 .              | 5.4 s.u.     |
| PLAT380_ALERT_4_G | Incorrectly? Oriented X(sp2)-Methyl Moiety ..... | C3 Check     |
| PLAT380_ALERT_4_G | Incorrectly? Oriented X(sp2)-Methyl Moiety ..... | C4 Check     |
| PLAT794_ALERT_5_G | Tentative Bond Valency for Cu (II) .             | 2.34 Info    |
| PLAT808_ALERT_5_G | No Parseable SHELXL Style Weighting Scheme Found | Please Check |
| PLAT881_ALERT_1_G | No Datum for _diffrn_reflns_av_R_equivalents ... | Please Do !  |
| PLAT899_ALERT_4_G | SHELXL97 is Deprecated and Succeeded by SHELXL   | 2016 Note    |

---

0 **ALERT level A** = Most likely a serious problem - resolve or explain  
3 **ALERT level B** = A potentially serious problem, consider carefully  
8 **ALERT level C** = Check. Ensure it is not caused by an omission or oversight  
12 **ALERT level G** = General information/check it is not something unexpected

5 ALERT type 1 CIF construction/syntax error, inconsistent or missing data  
10 ALERT type 2 Indicator that the structure model may be wrong or deficient  
0 ALERT type 3 Indicator that the structure quality may be low  
4 ALERT type 4 Improvement, methodology, query or suggestion  
4 ALERT type 5 Informative message, check

---

## Validation response form

Please find below a validation response form (VRF) that can be filled in and pasted into your CIF.

```
# start Validation Reply Form
_vrf_WEIGH01_ad26
;
PROBLEM: Extra text has been found in the
```

```

RESPONSE: ...
;
_vrf_PLAT155_ad26
;
PROBLEM: The Triclinic Unitcell is NOT Reduced ..... Please Do !
RESPONSE: ...
;
_vrf_PLAT230_ad26
;
PROBLEM: Hirshfeld Test Diff for   O1      --N1      .      5.1 s.u.
RESPONSE: ...
;
_vrf_PLAT241_ad26
;
PROBLEM: High      'MainMol' Ueq as Compared to Neighbors of      C5 Check
RESPONSE: ...
;
_vrf_PLAT242_ad26
;
PROBLEM: Low       'MainMol' Ueq as Compared to Neighbors of      C6 Check
RESPONSE: ...
;
_vrf_PLAT250_ad26
;
PROBLEM: Large U3/U1 Ratio for Average U(i,j) Tensor ....      2.7 Note
RESPONSE: ...
;
_vrf_PLAT412_ad26
;
PROBLEM: Short Intra XH3 .. XHn   H4A      ..H5B      ..      1.88 Ang.
RESPONSE: ...
;
# end Validation Reply Form

```

---

It is advisable to attempt to resolve as many as possible of the alerts in all categories. Often the minor alerts point to easily fixed oversights, errors and omissions in your CIF or refinement strategy, so attention to these fine details can be worthwhile. In order to resolve some of the more serious problems it may be necessary to carry out additional measurements or structure refinements. However, the purpose of your study may justify the reported deviations and the more serious of these should normally be commented upon in the discussion or experimental section of a paper or in the "special\_details" fields of the CIF. checkCIF was carefully designed to identify outliers and unusual parameters, but every test has its limitations and alerts that are not important in a particular case may appear. Conversely, the absence of alerts does not guarantee there are no aspects of the results needing attention. It is up to the individual to critically assess their own results and, if necessary, seek expert advice.

### **Publication of your CIF in IUCr journals**

A basic structural check has been run on your CIF. These basic checks will be run on all CIFs submitted for publication in IUCr journals (*Acta Crystallographica*, *Journal of Applied Crystallography*, *Journal of Synchrotron Radiation*); however, if you intend to submit to *Acta Crystallographica Section C* or *E* or *IUCrData*, you should make sure that full publication checks are run on the final version of your CIF prior to submission.

### **Publication of your CIF in other journals**

Please refer to the *Notes for Authors* of the relevant journal for any special instructions relating to CIF submission.

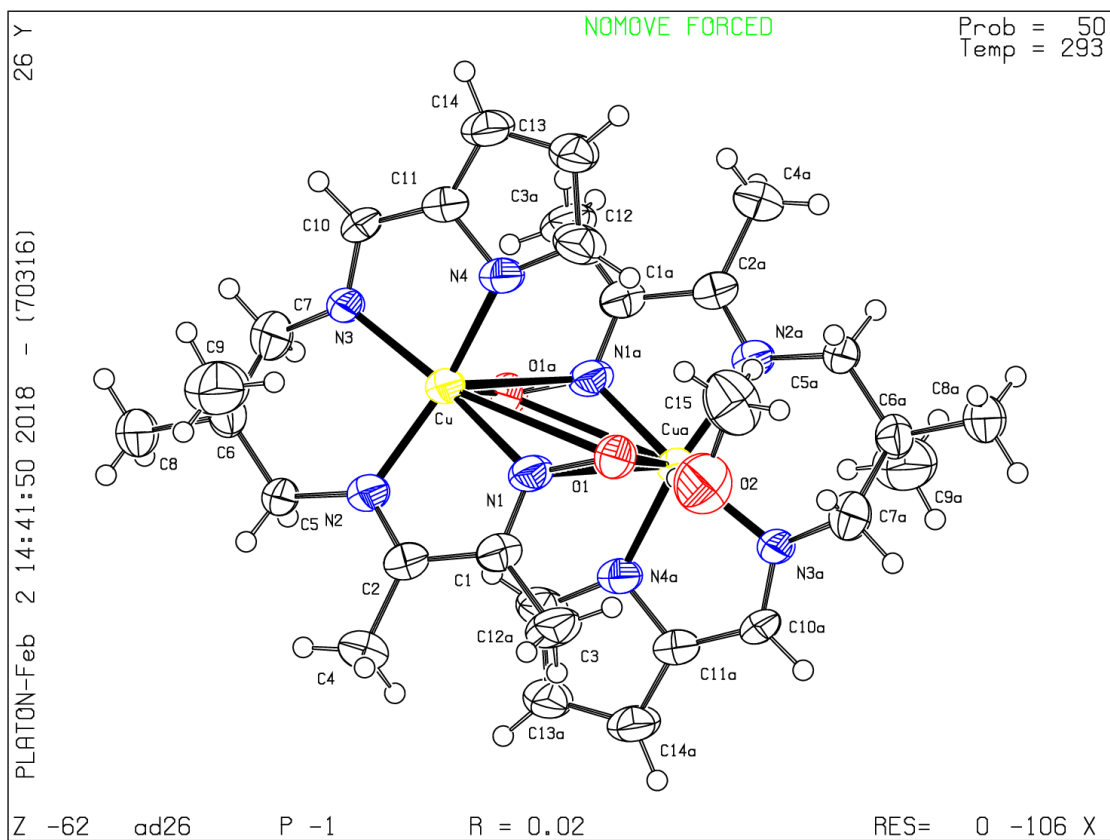

Supplement: s1 [file s1]
