# Supplementary material
Source: MDPI journal article supplement (https://www.mdpi.com/2304-6740/6/1/33)

# checkCIF/PLATON report

You have not supplied any structure factors. As a result the full set of tests cannot be run.

THIS REPORT IS FOR GUIDANCE ONLY. IF USED AS PART OF A REVIEW PROCEDURE FOR PUBLICATION, IT SHOULD NOT REPLACE THE EXPERTISE OF AN EXPERIENCED CRYSTALLOGRAPHIC REFEREE.

No syntax errors found.      CIF dictionary      Interpreting this report

## Datablock: ad18

---

Bond precision:    C-C = 0.0039 Å

Wavelength=0.71073

Cell:                a=10.6904(15)      b=13.0941(13)      c=10.0521(13)  
                      alpha=94.104(9)    beta=101.815(11)    gamma=93.942(10)  
Temperature:    293 K

|                | Calculated      | Reported        |
|----------------|-----------------|-----------------|
| Volume         | 1368.7(3)       | 1368.7(3)       |
| Space group    | P -1            | P -1            |
| Hall group     | -P 1            | ?               |
| Moiety formula | C13 H18 N4 Ni O | ?               |
| Sum formula    | C13 H18 N4 Ni O | C13 H18 N4 Ni O |
| Mr             | 305.00          | 305.02          |
| Dx,g cm-3      | 1.480           | 1.480           |
| Z              | 4               | 4               |
| Mu (mm-1)      | 1.415           | 1.415           |
| F000           | 640.0           | 640.0           |
| F000'          | 641.50          |                 |
| h,k,lmax       | 13,16,12        | 13,16,12        |
| Nref           | 5956            | 5957            |
| Tmin,Tmax      | 0.557,0.868     | 0.814,1.000     |
| Tmin'          | 0.488           |                 |

Correction method= # Reported T Limits: Tmin=0.814 Tmax=1.000  
AbsCorr = PSI-SCANS

Data completeness= 1.000

Theta(max)= 26.970

R(reflections)= 0.0316( 4690)

wR2(reflections)= 0.0933( 5957)

S = 1.095

Npar= 343

---

The following ALERTS were generated. Each ALERT has the format

**test-name\_ALERT\_alert-type\_alert-level.**

Click on the hyperlinks for more details of the test.

---

### Alert level C

WEIGH01\_ALERT\_1\_C Extra text has been found in the  
    \_refine\_ls\_weighting\_scheme field. This should be in the  
    \_refine\_ls\_weighting\_details field.  
    Weighting scheme given as calc w=1/[\s^2^(Fo^2^)+(0.0394P)^2^+0.7765  
    Weighting scheme identified as calc  
PLAT155\_ALERT\_4\_C The Triclinic Unitcell is NOT Reduced ..... Please Do !

---

### Alert level G

ABSTY01\_ALERT\_1\_G Extra text has been found in the \_exptl\_absorpt\_correction\_type  
    field, which should be only a single keyword. A literature  
    citation should be included in the \_exptl\_absorpt\_process\_details  
    field.  
PLAT005\_ALERT\_5\_G No Embedded Refinement Details Found in the CIF Please Do !  
PLAT199\_ALERT\_1\_G Reported \_cell\_measurement\_temperature ..... (K) 293 Check  
PLAT200\_ALERT\_1\_G Reported \_diffrn\_ambient\_temperature ..... (K) 293 Check  
PLAT232\_ALERT\_2\_G Hirshfeld Test Diff (M-X) Ni2 --N1B . 5.2 s.u.  
PLAT380\_ALERT\_4\_G Incorrectly? Oriented X(sp2)-Methyl Moiety ..... C3A Check  
PLAT380\_ALERT\_4\_G Incorrectly? Oriented X(sp2)-Methyl Moiety ..... C4A Check  
PLAT380\_ALERT\_4\_G Incorrectly? Oriented X(sp2)-Methyl Moiety ..... C3B Check  
PLAT380\_ALERT\_4\_G Incorrectly? Oriented X(sp2)-Methyl Moiety ..... C4B Check  
PLAT720\_ALERT\_4\_G Number of Unusual/Non-Standard Labels ..... 28 Note  
PLAT808\_ALERT\_5\_G No Parseable SHELXL Style Weighting Scheme Found Please Check  
PLAT881\_ALERT\_1\_G No Datum for \_diffrn\_reflns\_av\_R\_equivalents ... Please Do !  
PLAT899\_ALERT\_4\_G SHELXL97 is Deprecated and Succeeded by SHELXL 2016 Note

---

0 **ALERT level A** = Most likely a serious problem - resolve or explain  
0 **ALERT level B** = A potentially serious problem, consider carefully  
2 **ALERT level C** = Check. Ensure it is not caused by an omission or oversight  
13 **ALERT level G** = General information/check it is not something unexpected  
  
5 ALERT type 1 CIF construction/syntax error, inconsistent or missing data  
1 ALERT type 2 Indicator that the structure model may be wrong or deficient  
0 ALERT type 3 Indicator that the structure quality may be low  
7 ALERT type 4 Improvement, methodology, query or suggestion  
2 ALERT type 5 Informative message, check

---

## Validation response form

Please find below a validation response form (VRF) that can be filled in and pasted into your CIF.

```
# start Validation Reply Form
_vrf_WEIGH01_ad18
;
PROBLEM: Extra text has been found in the
RESPONSE: ...
;
_vrf_PLAT155_ad18
;
PROBLEM: The Triclinic Unitcell is NOT Reduced ..... Please Do !
RESPONSE: ...
;
# end Validation Reply Form
```

---

It is advisable to attempt to resolve as many as possible of the alerts in all categories. Often the minor alerts point to easily fixed oversights, errors and omissions in your CIF or refinement strategy, so attention to these fine details can be worthwhile. In order to resolve some of the more serious problems it may be necessary to carry out additional measurements or structure refinements. However, the purpose of your study may justify the reported deviations and the more serious of these should normally be commented upon in the discussion or experimental section of a paper or in the "special\_details" fields of the CIF. checkCIF was carefully designed to identify outliers and unusual parameters, but every test has its limitations and alerts that are not important in a particular case may appear. Conversely, the absence of alerts does not guarantee there are no aspects of the results needing attention. It is up to the individual to critically assess their own results and, if necessary, seek expert advice.

### **Publication of your CIF in IUCr journals**

A basic structural check has been run on your CIF. These basic checks will be run on all CIFs submitted for publication in IUCr journals (*Acta Crystallographica*, *Journal of Applied Crystallography*, *Journal of Synchrotron Radiation*); however, if you intend to submit to *Acta Crystallographica Section C* or *E* or *IUCrData*, you should make sure that full publication checks are run on the final version of your CIF prior to submission.

### **Publication of your CIF in other journals**

Please refer to the *Notes for Authors* of the relevant journal for any special instructions relating to CIF submission.

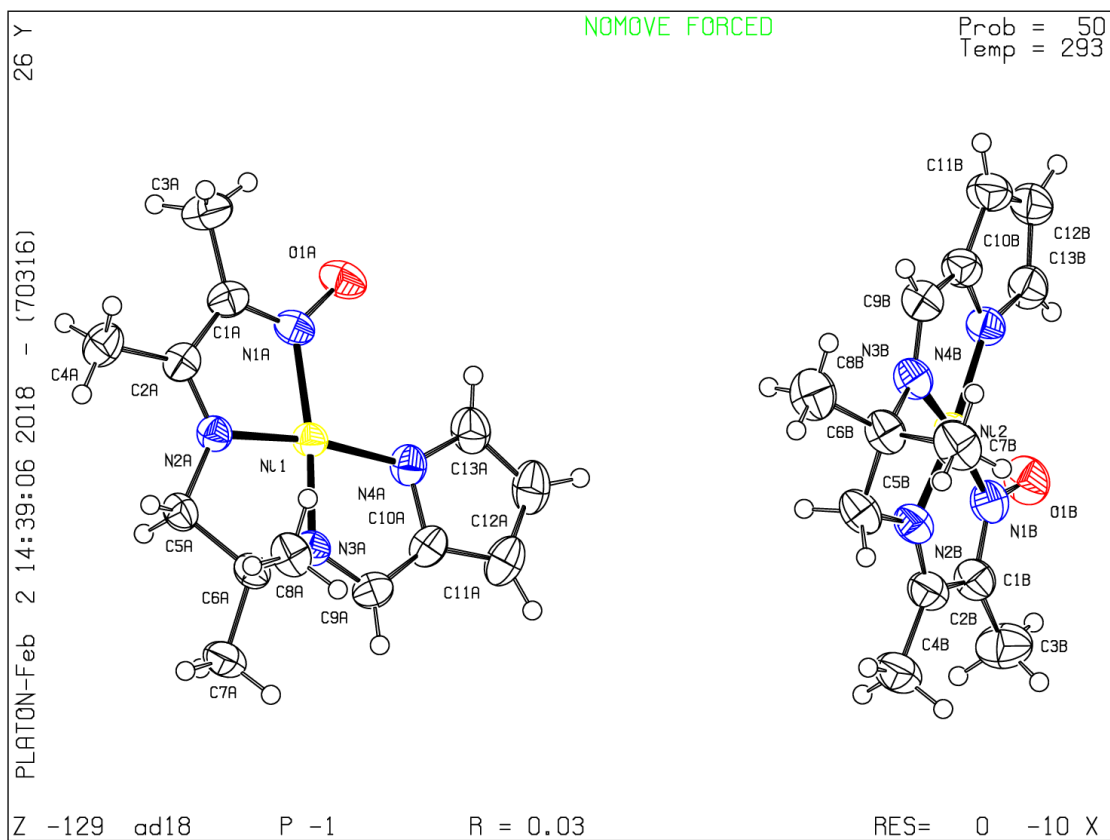

Supplement: s1 [file s1]
