# Supplementary material
Source: MDPI journal article supplement (https://www.mdpi.com/2304-6740/6/1/33)
Supplement: s1 [file s1]

# Supplementary Material: Reaction of Non-Symmetric Schiff Base Metallo-Ligand Complexes Possessing an Oxime Function with Ln Ions

Jean-Pierre Costes<sup>1,2</sup>, Françoise Dahan<sup>1,2</sup>, Arnaud Dupuis<sup>1,2</sup>, Sergiu Shova<sup>3</sup> and Javier Garcia Tojal<sup>4</sup>

<sup>1</sup> Laboratoire de Chimie de Coordination du CNRS, 205, route de Narbonne, BP 44099, Toulouse CEDEX 4 F-31077, France; arnaud.dupuis@gmail.com

<sup>2</sup> Université de Toulouse, UPS, INPT, Toulouse CEDEX 4 F-31077, France

<sup>3</sup> Petru Poni, Institute of Macromolecular Chemistry, Aleea Grigore Ghica Voda 41A, Iasi 700487, Romania; shova@icmpp.ro

<sup>4</sup> Departamento de Química, Facultad de Ciencias, Universidad de Burgos, Plaza Misael Bañuelos s/n, Burgos 09001, Spain; qipgatoj@ubu.es

\* Correspondence: jean-pierre.costes@lcc-toulouse.fr; Tel.: +33-056-133-3100

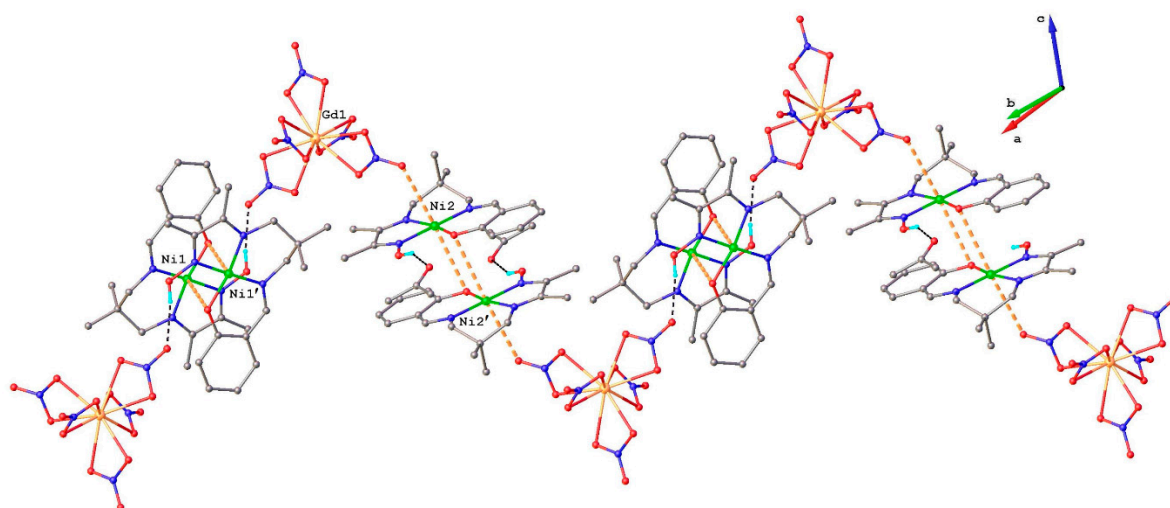

**Figure S1.** Supramolecular chain in the crystal structure **6**. Non-relevant H-atoms are omitted. H-bonds and apical Ni-O contacts are shown in black and orange dashed line, respectively.

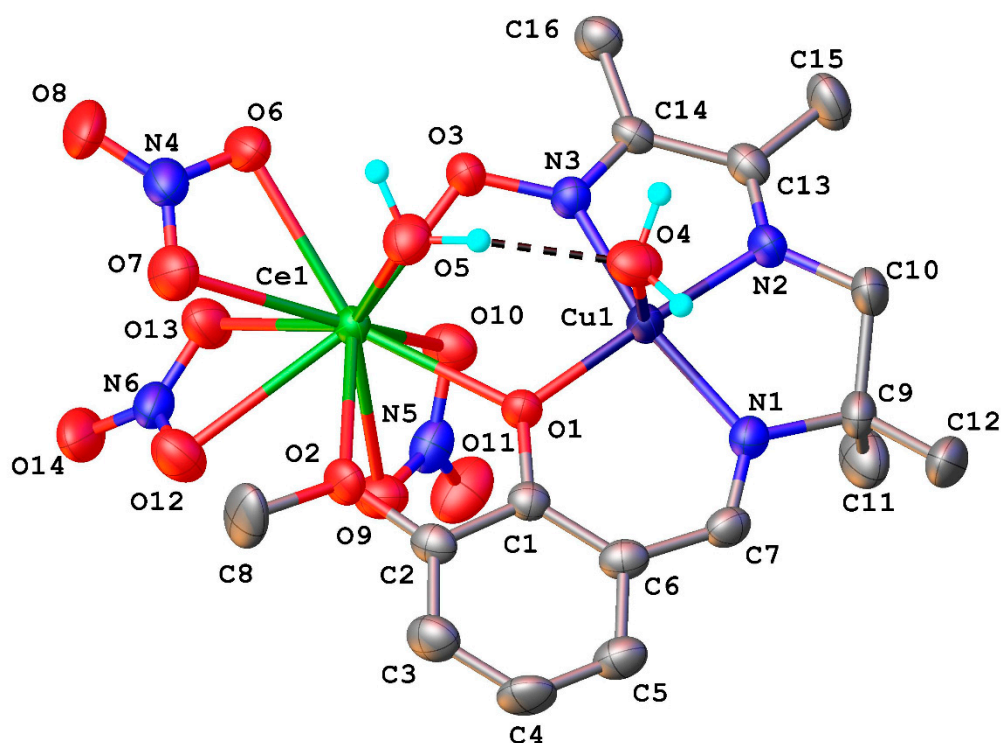

**Figure S2.** X-ray molecular structure of  $[\text{CuL}^5\text{Ce}(\text{NO}_3)_3(\text{H}_2\text{O})_2]$  (**7**) with atom labelling scheme and thermal ellipsoids at 40% probability level. Non-relevant H-atoms are omitted. Selected bond lengths ( $\text{\AA}$ ) and angles  $\text{Cu1-N1}$  1.953(4),  $\text{Cu1-N2}$  1.929(4),  $\text{Cu1-N3}$  2.012(4),  $\text{Cu1-O1}$  1.929(3),  $\text{Cu1-O4}$  2.376(4),  $\text{N3-O3}$  1.346(4),  $\text{C14-N3}$  1.292(5),  $\text{Ce1-O1}$  2.462(3),  $\text{Ce1-O2}$  2.575(3),  $\text{Ce1-O3}$  2.424(3),  $\text{Ce1-O5}$  2.580(4),  $\text{Ce1-O6}$  2.572(3),  $\text{Ce1-O7}$  2.639(4),  $\text{Ce1-O9}$  2.663(3),  $\text{Ce1-O10}$  2.555(3),  $\text{Ce1-O12}$  2.575(3),  $\text{Ce1-O13}$  2.572(3);  $\text{N2-Cu1-N1}$  83.4(2),  $\text{O1-Cu1-N1}$  95.4(1),  $\text{N2-Cu1-N3}$  80.4(2),  $\text{O1-Cu1-N3}$  99.0(2),  $\text{Cu1-O1-Ce1}$  113.11),  $\text{O3-N3-Cu1}$  127.1(3),  $\text{N3-O3-Ce1}$  114.4(2),  $\text{O3-Ce1-O1}$  83.46(9). H-bond parameters:  $\text{O5-H}\cdots\text{O4}$  [ $\text{O5-H}$  0.95  $\text{\AA}$ ,  $\text{H}\cdots\text{O4}$  1.98  $\text{\AA}$ ,  $\text{O5}\cdots\text{O4}$  2.876(6)  $\text{\AA}$ ,  $\angle\text{O5-H-O4}$  156.9°].

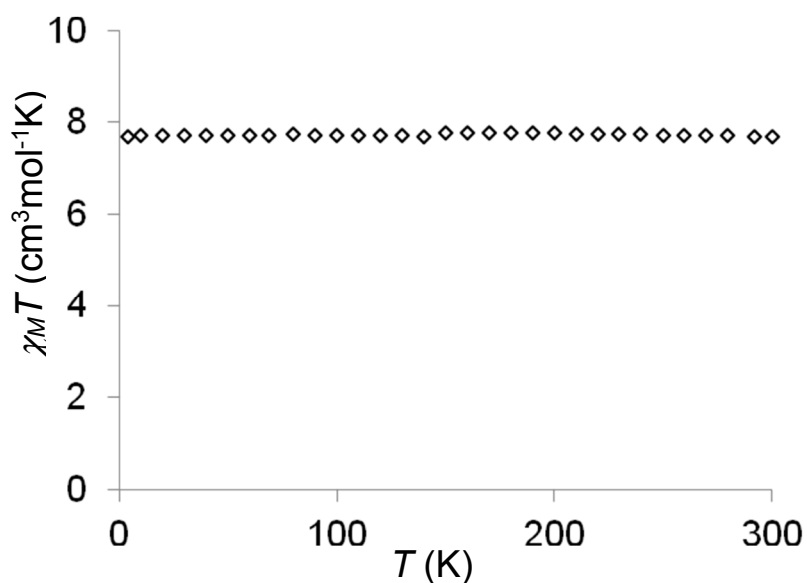

**Figure S3.** Temperature dependence of the  $\chi_M T$  product for complex **6** at an applied magnetic field of 0.1 T.

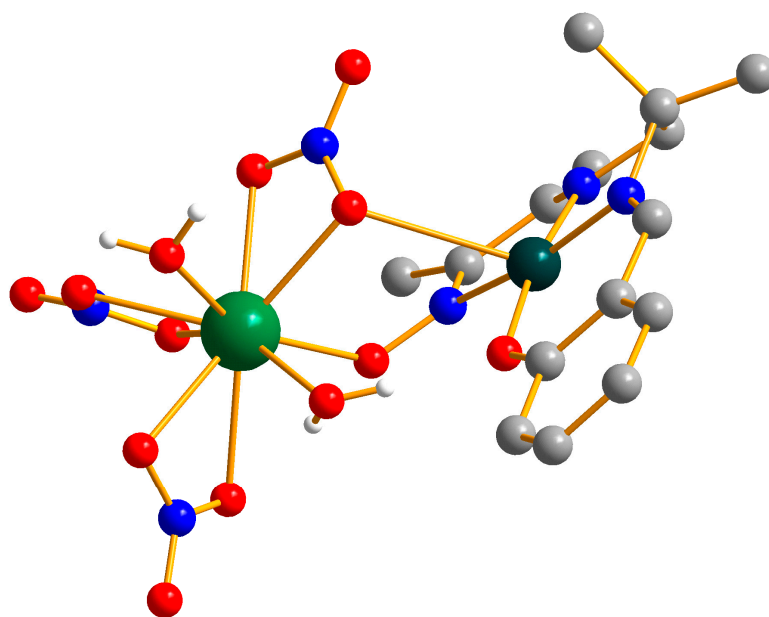

**Figure S4.** Molecular plot for complex  $\text{CuL}^5\text{Er}(\text{NO}_3)_3(\text{H}_2\text{O})_2$  [21].
